# Supplementary material for: Resurrecting the ancient glow of the fireflies
Source: PubMed Central journal article supplement — Sci Adv. 2020 Dec 2;6(49):eabc5705. doi: 10.1126/sciadv.abc5705 (PMC7710365; doi:10.1126/sciadv.abc5705), 2020-12-02
Supplement: supp_6_49_eabc5705__1.pdf [file supp_6_49_eabc5705__1.pdf]

## Supplementary Materials for

### Resurrecting the ancient glow of the fireflies

Y. Oba\*, K. Konishi, D. Yano, H. Shibata, D. Kato, T. Shirai\*

\*Corresponding author. Email: [yoba@isc.chubu.ac.jp](mailto:yoba@isc.chubu.ac.jp) (Y.O.); [t\\_shirai@nagahama-i-bio.ac.jp](mailto:t_shirai@nagahama-i-bio.ac.jp) (T.S.)

Published 2 December 2020, *Sci. Adv.* **6**, eabc5705 (2020)  
DOI: 10.1126/sciadv.abc5705

#### The PDF file includes:

Figs. S1 to S6  
Tables S2, S4 and S6  
References

#### Other Supplementary Material for this manuscript includes the following:

(available at [advances.sciencemag.org/cgi/content/full/6/49/eabc5705/DC1](https://advances.sciencemag.org/cgi/content/full/6/49/eabc5705/DC1))

Tables S1, S3 and S5  
PDB Summary Validation Report 6K4C  
PDB Summary Validation Report 6K4D

# Supplementary Materials

|                  |                                                                                    |     |
|------------------|------------------------------------------------------------------------------------|-----|
| Known mutations  |                                                                                    |     |
| Luciola_cruciata | MENMENDENIVVGGPKFPYIEEAGTQLRKMYAKL-GAIAFTNAVITGVDYSYAEYLEKSCCLGKALQNYGLVVDGR       | 79  |
| AncLucin1        | ----KE...Y..E.....H...KQ.....L...I.....D...I...R.AE.MK...K...                      | 78  |
| AncLampn1        | ----E.K..MH..A...L.D.T..E..H.A.K...QIP.T...D.HAE.NIT...F.MA.R.AE.MKR...GLQH.       | 77  |
| AncLuc2          | ----E.K..LY..E...L.D.T..E..Y.ALKK..QIP.C.L...H.KENVL.K.L..LT.R.AES.K...KTNST       | 76  |
| AncLuc1          | ----ME.K..Y..E...L.D.T..E..H.A.K...Q.P.T...D.H.E.NI...DVT.R.AE.MK...KLNH.          | 77  |
| AncLamp          | ----E.K..Y..E...L.D.T..E..Y.ALKK..Q.P.T..L.D.H.EENI...L..LT.R.AES.K...KQNT         | 76  |
| AncCanth         | ----EEK...H..E.LH.L.D.T..Q..Y.ALKK.SH--PE.LID.H.EENI...L..TT.R.AES.K...KQNNV       | 74  |
| AncElat          | ----KKEK...H..E.LH.L.D.T..Q..YNALKKHS--PE.LID.H.EESI..K.L..TT.R.AES...YKQNDV       | 75  |
| AbLL             | ----SKES...Y..VGAA.VL.ST..K..FDSLK.HGH--PQ.IIDYQ.KQSI..KNLF.AT.K.AHS.EE...KQNDV    | 75  |
| Known mutations  |                                                                                    |     |
| Luciola_cruciata | IALCSEENCEFFPIVAGLFIGVGVAPTNEIYTLRELVHSLGISKPTIVFSSKKGLDKVITVQKTVTTIQTIVILDSKVD    | 159 |
| AncLucin1        | ....D.ME....L..Y.....P.....N.....O..LE.....C.K.....                                | 158 |
| AncLampn1        | ..V...SLQ..M..VGA.....D..NE...YN..N..Q.....C..RA.Q..ILG...KLPV..K...E              | 157 |
| AncLuc2          | ..V...NLQ.....A.Y...A...V.DK..E...IN..N.....I..C..QT.Q..ILQ..K.KLNY.KK.I...E       | 156 |
| AncLuc1          | ..V...LQ.....A.Y...A...D..E...IN..N.....C..A.Q..ILE...KLP.C.KK...E                 | 157 |
| AncLamp          | ..V...NLQ.....A.Y...A...V.DK..E...IN..N.....I..C..T.Q..ILQ..K.KLSY.KK.I...E        | 156 |
| AncCanth         | ..SV...NLQ.....A.Y...I..V.DN..E...IN..N.....LI..C..T.P..ILQ..K.KLSF.KK.I...E       | 154 |
| AncElat          | ..SI...NLQ.....A.Y...I..V.DN..E...INA..N.....KLI..C..T.P..ILQ..K.KLSF.KK.I...DE    | 155 |
| AbLL             | ..I...NLN.YK..C.A.YC.IVI..L.DS.SEG.Y.NA.N..E.KLI..C..C..PRLVGLKARCSF.KGF.VI...TE   | 155 |
| Known mutations  |                                                                                    |     |
| Luciola_cruciata | YRGYQCLDTF IKRNTPPGQASSFKTVEVDREKQVALIMNSSGSTGLPKGVQLTHENTVTRF SHARDPIYGNQVSPGTAV  | 239 |
| AncLucin1        | ....D.ME....KHV.A.....P.....N.....I.....I.....                                     | 236 |
| AncLampn1        | ..M...SMYS..ESH.L.A..NEVDYVPDSF..DQAT.....E...K.VCV...C...VF...II.D...I            | 237 |
| AncLuc2          | IA...NN..SQ.CD.N.NV.N..PNSFN.D.....T.....M...K.L.V...CK..F...IN...I                | 236 |
| AncLuc1          | ..M...MHS..QH.DAN.NV.N..P.SF..D.....T.....M...K.L.V...C...F...II...I               | 237 |
| AncLamp          | IG...NN..SQ.HDAN.NV.N..PNSF..D.....T.....M...K.L.V...C...F...II...I                | 236 |
| AncCanth         | IN.CE..SN..S.YSDAN.NV.N..P.DF.PD.....S...T.....M...K.L.V...V.C...F.T.II...SI       | 234 |
| AncElat          | IN.CE..SN..S.YSDAN.NV.N..P.DF.PN.....LC..T.....M...K.L.V...A.C...RF.T.II...T       | 235 |
| AbLL             | IN.NE..PN..L..SD.N.DIEKYEPVFNSEN...A.LL...T..F...M...K.FSIL.A..N.VS.T.R.I...T      | 235 |
| Known mutations  |                                                                                    |     |
| Luciola_cruciata | LTIVVPPHHCFCGMFTLGLYLCIGFRVVMVLTQKFDGTLKTLQDYKCTSVILVPTLFAILNKSELNKLVDLSNLVIEASGCA | 319 |
| AncLucin1        | ....I...I.....T...I.....EL.....I.....ID.F.....                                     | 318 |
| AncLampn1        | ..I...I.....T...I.LMYR.E.EL..RS...IQ.AL...SFFA..T.VD...H...I                       | 317 |
| AncLuc2          | ..I...I.....T...I.LMHT.E.RL..QS...VE.TL...M.FFA..P.VD...H.K...I                    | 316 |
| AncLuc1          | ..I...I.....T...I.LMHR.E.EL..S...Q.AL...M.FFA..P.VD...H...I                        | 317 |
| AncLamp          | ..I...I.....T...I.LMHR.E.EL..S...VQ.TL...M.FFA..P.VD...K...I                       | 316 |
| AncCanth         | ..SHI...A.....F.V.L.I..MKR.E.EL..I...VQ..IL...PIMVF.A..P.VD...S.K...I              | 314 |
| AncElat          | ..SFL...F.A..F...FMV.L...MKR.E.EL..AI...VR..II..PIMVF.A..P.VD...S.K...C.A          | 315 |
| AbLL             | ..SLL.YF...L..FI..NIS.IKS.I...QR.EPEA..RAIEE.EVR.T..P..PILIF.A..PIVD..N..S.K..IC.A | 315 |
| Known mutations  |                                                                                    |     |
| Luciola_cruciata | PLSKEVGEAVARRFNLPGVROCYGLTETTSALIIITPEGDDKPGASGVVPLFSAKVIDLDTKKSGLGNRRGEVCKGPM     | 399 |
| AncLucin1        | ....A.....K..K..I.....V.....F..IV...G.T..V.Q...I...I                               | 396 |
| AncLampn1        | ....I...K..K.KSI...L...V.R..ST...F.A..V.TT.G.I...ET..L.F..D.I                      | 396 |
| AncLuc1          | ....A.....K..K..I.....T...F...V...G.T...Q...L.F...I                                | 397 |
| AncLamp          | ....K..K..I.....V...ST...F...V...G.T...Q...L.F..D.I                                | 396 |
| AncCanth         | ....K.LK..I.....V...HN.V...ST...FM...I...G.A...Q...L.F..D.I                        | 394 |
| AncElat          | ....I...VK.L..I.....L.V...HN.F...S...FM...I...G.A...QI..L.F..D.V                   | 395 |
| AbLL             | ..SGR.IV...VK.LKVS.I.Y...CGL..CT..PNNF.I.S.V...FMAV.IR.VESG.T.K.TQI.I...D..        | 395 |
| Known mutations  |                                                                                    |     |
| Luciola_cruciata | MKGyvNNPEATKELIDEEGLWHTGDIGYDEEKHFFIVDRLKSILIKYGYQVPAAELSVLLQHPNIFDAGVAGVDPDVA     | 479 |
| AncLucin1        | ....R..I.....D.....D.....E.....                                                    | 478 |
| AncLampn1        | ....NA...KD..S..A...DG.....I.....F.....I...ED                                      | 477 |
| AncLuc2          | ....C..A...AI..KD..S...DG.....A.....GI...S.I...T.I...ED                            | 476 |
| AncLuc1          | ....I...KD..S...DG.....I.....S.....ED                                              | 477 |
| AncLamp          | ....I...KD..S...DG.....A.....I.....S.I...T.I...ED                                  | 476 |
| AncCanth         | ....A..KD..S...DG.....E.....A.....L...S.K...T.I...EE                               | 474 |
| AncElat          | ....T...A..D...S...DG..Y...E.....A...AL..T..S.K...V.I...EE                         | 475 |
| AbLL             | ....AG.EK...M...D...F.KDG.IY...I.E...F...AL..H..CVK..A.I.I...EL                    | 475 |
| Known mutations  |                                                                                    |     |
| Luciola_cruciata | GELPGAVVVLESKSMTEKVEVMYDASQVSNAKRLRGVRFVDEVPKGLTGKIDGRAIREILKPKV-AKM               | 548 |
| AncLucin1        | ....K..H...I.....G...TAS...K...S.K...V.AKKS.L                                      | 547 |
| AncLampn1        | ....A.C...QP..HL..EN..IN..S...S...RK.L.Q..Q.QR-S.L                                 | 545 |
| AncLuc1          | ....K..H...I.....S...S...S...Q-S.L                                                 | 546 |
| AncLamp          | ....A.C...QP..HL..I...S...S...RK.L.Q..Q.QR-S.L                                     | 545 |
| AncCanth         | ....A.C...QP..NL...I...E...S...I...S...VRKEL.K.A.KK-S.L                            | 543 |
| AncElat          | ....A.F...KQP..NL...I.F...E...S...I...NS...LRKEL.KL.A.KK-S.L                       | 544 |
| AbLL             | ....A.FI.KQH..EV...IV..I.K...S...H...IPDI.RTAA...QRNLL.NMIA.KK-S.L                 | 544 |

**Fig. S1. Multiple-sequence alignment of ancestral luciferases.** The amino acid residues of the ancestral luciferases, which are identical to *L. cruciata* LcLuc1, are

shown as a dot. The substrate-binding site residues (Ser<sup>197</sup>, Ser<sup>198</sup>, Arg<sup>217</sup>, His<sup>244</sup>, Thr<sup>250</sup>, Gly<sup>315</sup>, Gly<sup>338</sup>, Thr<sup>342</sup>, Ser<sup>346</sup>, Ala<sup>347</sup>, Thr<sup>526</sup>, and Lys<sup>528</sup> reference the positions in AncLamp) (7) are outlined in blue. The sites relevant to the AncLamp luminescence spectra predicted by the crystal structure (Ile<sup>236</sup>, Thr<sup>238</sup>, Ile<sup>240</sup>, Phe<sup>246</sup>, and Leu<sup>285</sup>) are outlined in green (shown on structure in Fig. 3). The more ambiguously identified sites (posterior probability less than 0.1 higher than the second most probable amino acid) are shown in magenta (depicted on structures in fig. S3). The ‘know mutations’ lines indicate the reported site-directed mutation sites (listed in table S5) that cause luminescence wavelength shifts. The residue sites related to hypsochromic-, bathochromic-, and both-shift are indicated with asterisks in blue, red, and purple, respectively. AbLL, *A. binodulus* fatty acyl-CoA synthetase.

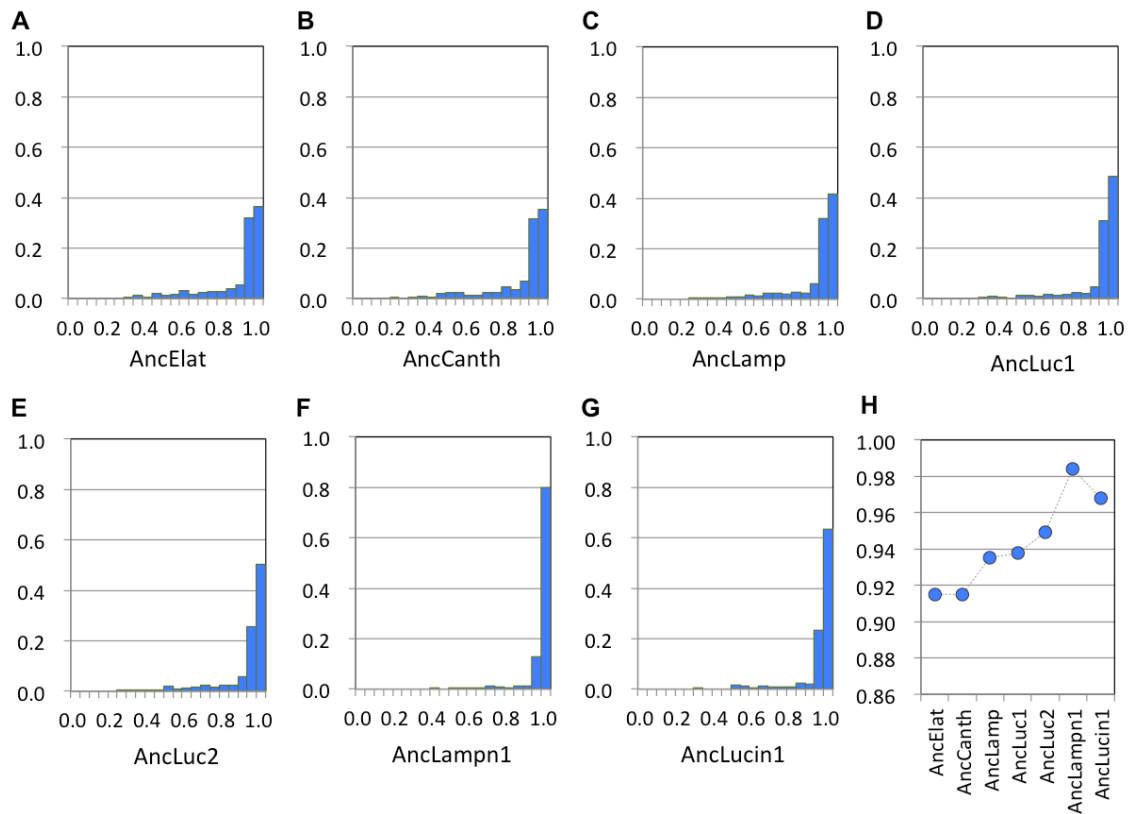

**Fig. S2. Posterior probability distributions of the residue sites.** (A) AncElat, (B) AncCanth, (C) AncLamp, (D) AncLuc1, (E) AncLuc2, (F) AncLampn1, and (G) AncLucin1. Horizontal and vertical axes show posterior probability bins and fractional frequency of inferred sites, respectively. (H) Average posterior probabilities are plotted over the ancestral luciferases.

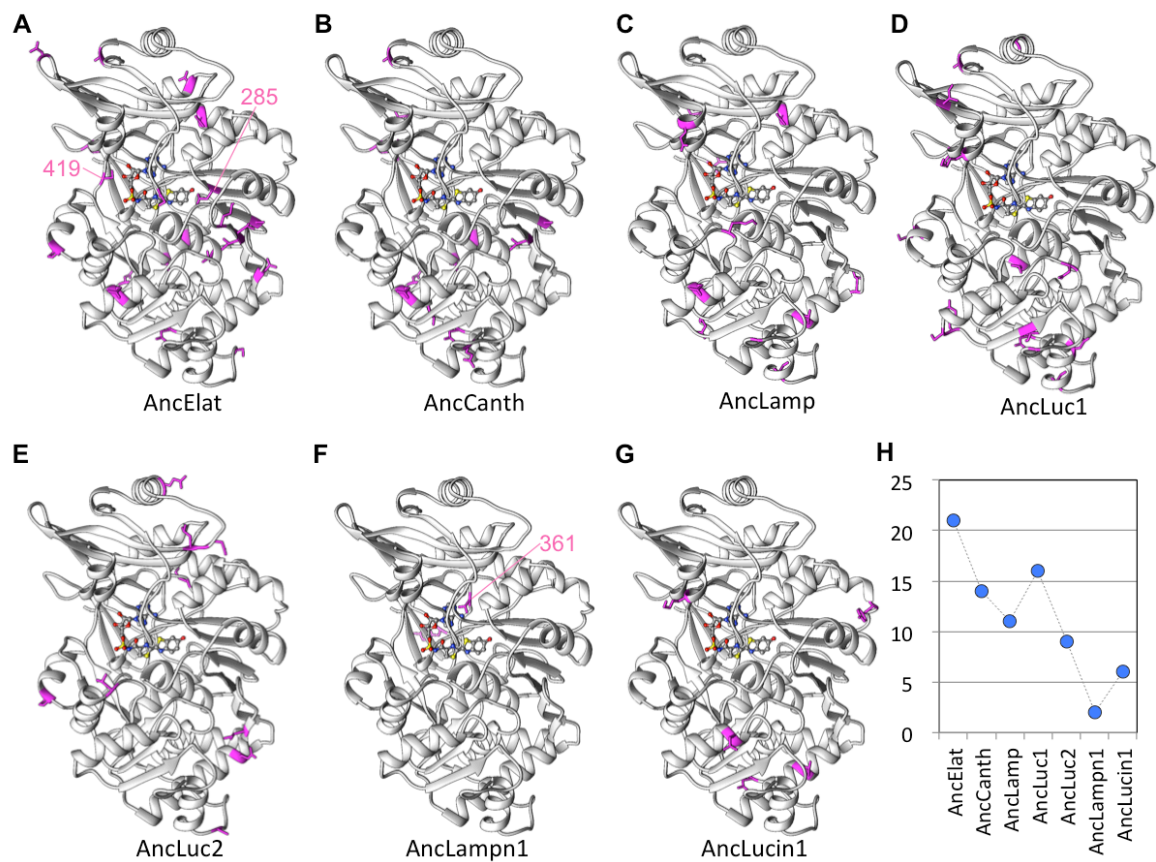

**Fig. S3. Ambiguous residues.** The residues, for which the posterior probability is less than 0.1 higher than the second most probable amino acid (listed in table S1), are mapped in magenta for (A) AncElat, (B) AncCanth, (C) AncLamp, (D) AncLuc1, (E) AncLuc2, (F) AncLampn1, and (G) AncLucin1 on the crystal structure of AncLamp. The sites that might have direct interaction with the substrate-binding site residues, namely Val<sup>361</sup> in AncLampn1, and Leu<sup>285</sup> & Ser<sup>419</sup> in AncElat (also indicated in fig. S1) are denoted with residue number. (H) Total numbers of ambiguous residues are plotted over the ancestral luciferases.

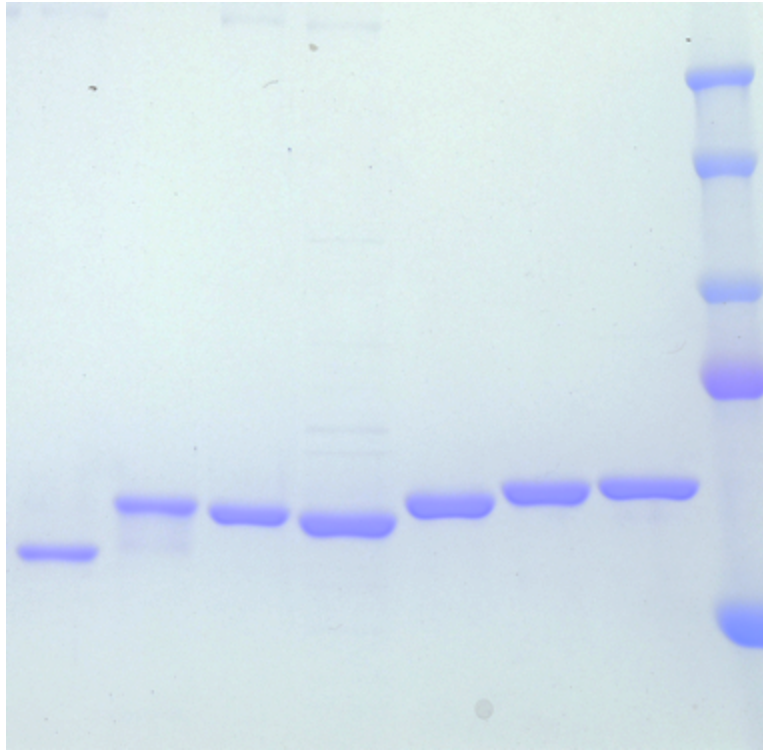

**Fig. S4. SDS-PAGE gel stained by CBB.** 430 ng of each protein was loaded. From left: AncElat, AncCanth, AncLamp, AncLuc2, AncLuc1, AncLucin1, AncLampn1, and molecular marker (from top, 250, 150, 100, 75, 50 kDa; Precision Plus Protein Dual Standards, Bio-Rad).



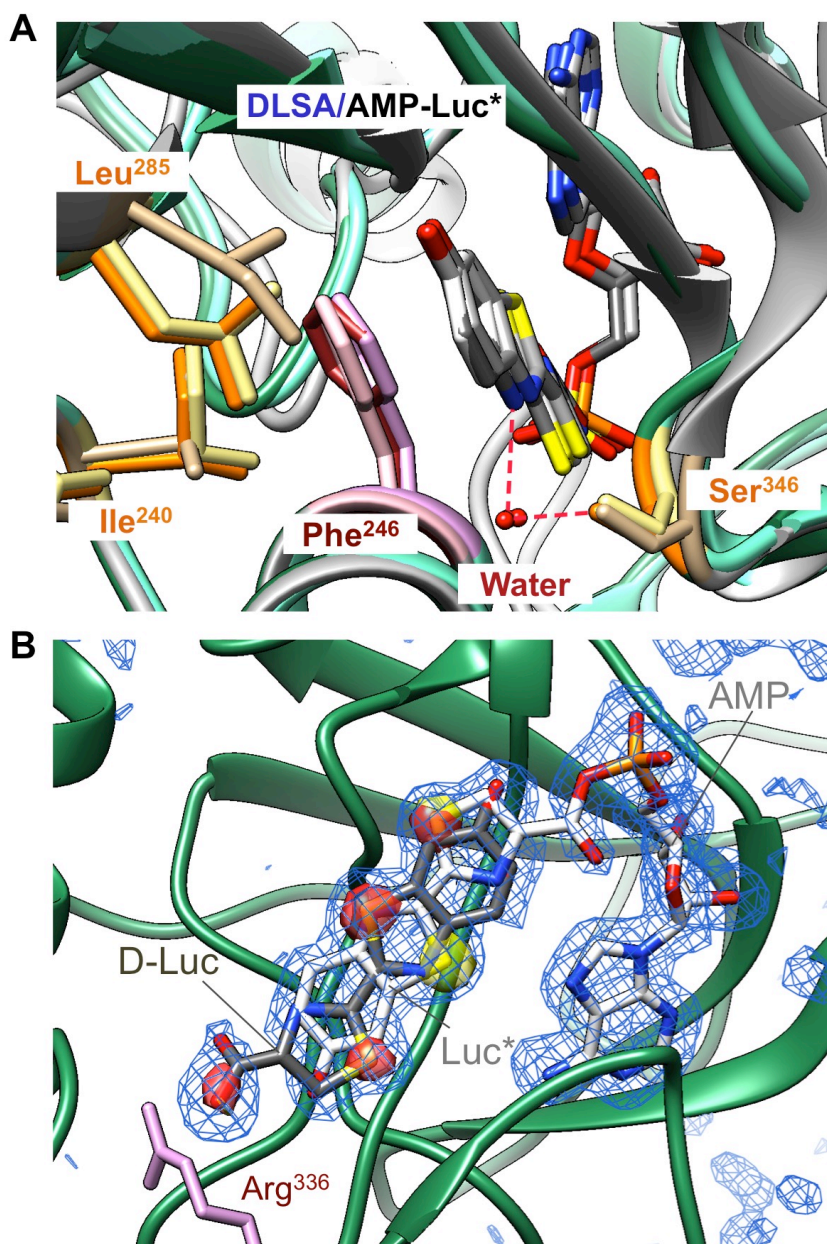

**Fig. S5. The substrate-binding site structure of AncLamp.** (A) Interaction between Ser<sup>346</sup> (Ser<sup>349</sup> in LcLuc1) and DLSEA/AMP-Luc\* in AncLamp - DLSEA (green), LcLuc1 - DLSEA (white), and AncLamp - substrates (D-luciferin/ATP) (light green) complex structures. In all structures, a water molecule (Water) mediate hydrogen bond networks from O<sub>γ</sub> of Ser to the nitrogen atom of thiazole plane of DLSEA/AMP-Luc. The hydrogen bonds in the AncLamp - DLSEA only are shown by red dotted lines. (B) The substrate-binding site structure of AncLamp - substrates (D-luciferin/ATP) complex. The all ligand omitting *F<sub>o</sub> - F<sub>c</sub>* map is shown in blue mesh (contoured at 10  $\sigma$ ). Also the *F<sub>o</sub> - F<sub>c</sub>* D-Luc omitting map (red, 30  $\sigma$ ), and the Luc\* omitting map (yellow, 30  $\sigma$ )

are superposed. The probable non-reactive D-luciferin (D-Luc, carbon atoms are shown in gray) and AMP and luciferyl moiety in the probable reaction intermediate (Luc\*, carbon atoms are shown in white) are indicated with stick models. The carboxylate moiety of the non-reactive D-luciferin makes an electro-static interaction with Arg<sup>336</sup> in this configuration.



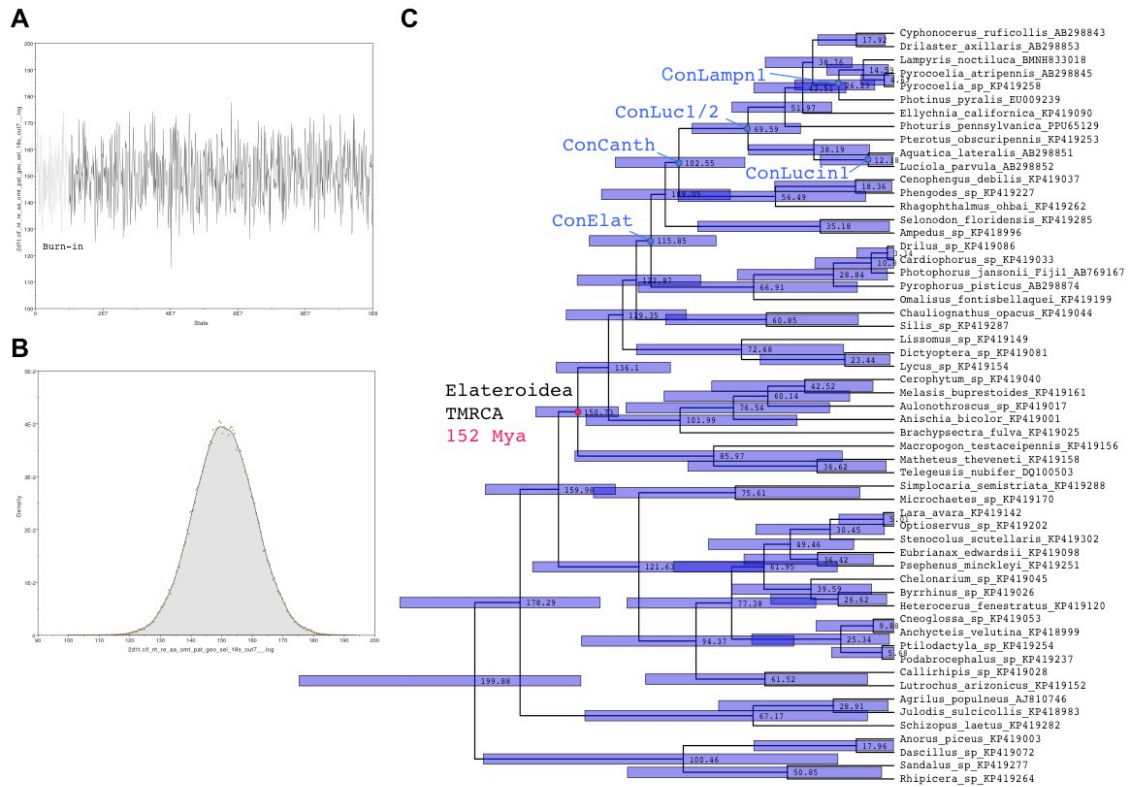

**Fig. S6. Geological dating.** (A) The trajectory and (B) Distribution of Elateroidea common ancestor geological age during MCMC simulation for  $10^8$  iterations. The initial  $10^7$  iterations are burn-in process. (C) The phylogeny of Elateriformia species. The leaf nodes are indicated with species names and GenBank accession number of corresponding 18S rRNA gene sequence. The median of estimated geological age and 95% HPD (purple bar) are indicated on each node. The reference Elateroidea TMRCA (16) is highlighted with a magenta circle, and the nodes corresponding to the hypothesized ancestral species, which genomes encoded AncElat, AncCanth, AncLampn1, and AncLucin1 are indicated with blue circles and labeled as ConElat, ConCanth, ConLampn1, and ConLucin1, respectively. ConLuc1/2 is the first species, which had the duplicated genes of AncLuc1 and AncLuc2.

**Table S2. X-ray crystallography data collection and refinement statistics.**

| Protein <sup>b</sup>                      | AncLamp - DLSA<br>complex (6K4C) <sup>a</sup> | AncLamp - ATP -<br>D-luciferin complex<br>(6K4D) <sup>a</sup> |
|-------------------------------------------|-----------------------------------------------|---------------------------------------------------------------|
| Space group                               | <i>C222<sub>1</sub></i>                       | <i>C222<sub>1</sub></i>                                       |
| Cell constants (a, b, c Å)                | 48.3, 123.4, 177.4                            | 48.8, 123.7, 177.0                                            |
| Wavelength (Å)                            | 1.0000                                        | 1.0000                                                        |
| Resolution range - data<br>collection (Å) | 20.00 - 2.10 (2.21 - 2.10)                    | 20.00 - 1.70 (1.79 - 1.70)                                    |
| R <sub>sym</sub>                          | 0.032 (0.073)                                 | 0.014 (0.030)                                                 |
| Completeness (%)                          | 99.7 (100.0)                                  | 96.3 (95.4)                                                   |
| $\langle I/\sigma I \rangle$              | 14.0 (6.9)                                    | 75.6 (22.5)                                                   |
| Resolution range -<br>refinement (Å)      | 20.00 - 2.10 (2.17 - 2.10)                    | 20.00 - 1.70 (1.73 - 1.70)                                    |
| No. reflections                           | 31197(3317)                                   | 55829 (2520)                                                  |
| R <sub>cryst</sub>                        | 0.208 (0.266)                                 | 0.163 (0.226)                                                 |
| R <sub>free</sub>                         | 0.244 (0.328)                                 | 0.189 (0.280)                                                 |
| RMSD length (Å)                           | 0.007                                         | 0.017                                                         |
| RMSD angle (°)                            | 0.98                                          | 1.22                                                          |

<sup>a</sup> Values for the highest resolution bin are in parentheses.

<sup>b</sup> In parentheses PDB accession codes.

**Table S4. Hydrogen bonds on DLSA molecule.**

| DLSA moiety      | AncLamp (6K4C) <sup>a</sup>                                |      | LcLuc1 (2D1S) <sup>a</sup>                                                           |                |
|------------------|------------------------------------------------------------|------|--------------------------------------------------------------------------------------|----------------|
| Luciferyl-moiety | SLU <sup>601</sup> O10 - HOH <sup>704</sup> O              | 2.34 | SLU <sup>2001</sup> O10 - HOH <sup>2135</sup> O                                      | 2.73           |
|                  | SLU <sup>601</sup> N7 - HOH <sup>810</sup> O               | 2.99 | SLU <sup>2001</sup> N7 - HOH <sup>2002</sup> O                                       | 2.82           |
|                  | SLU <sup>601</sup> O39 - Lys <sup>527</sup> N $\zeta$      | 2.96 | SLU <sup>2001</sup> O39 - HOH <sup>2014</sup> O (-<br>Lys <sup>531</sup> N $\zeta$ ) | 2.63<br>(2.77) |
| AMP-moiety       | -                                                          | -    | SLU <sup>2001</sup> O18 - Ser <sup>200</sup> O $\gamma$                              | 3.08           |
|                  | -                                                          | -    | SLU <sup>2001</sup> O19 - Ser <sup>201</sup> N                                       | 3.30           |
|                  | -                                                          | -    | SLU <sup>2001</sup> O19 - Ser <sup>201</sup> O $\gamma$                              | 2.98           |
|                  | -                                                          | -    | SLU <sup>2001</sup> O18 - Thr <sup>345</sup> N                                       | 3.11           |
|                  | SLU <sup>601</sup> O18 - Thr <sup>341</sup> O $\gamma$ 1   | 3.31 | SLU <sup>2001</sup> O18 - Thr <sup>345</sup> O $\gamma$ 1                            | 3.00           |
|                  | -                                                          | -    | SLU <sup>2001</sup> O18 - HOH <sup>2223</sup> O                                      | 2.80           |
|                  | SLU <sup>601</sup> O19 - His <sup>243</sup> N $\epsilon$ 2 | 2.87 | SLU <sup>2001</sup> O19 - His <sup>247</sup> N $\epsilon$ 2                          | 2.85           |
|                  | SLU <sup>601</sup> O19 - HOH <sup>812</sup> O              | 2.71 | -                                                                                    | -              |
|                  | SLU <sup>601</sup> O20 - HOH <sup>812</sup> O              | 3.14 | SLU <sup>2001</sup> O20 - HOH <sup>2014</sup> O                                      | 3.33           |
|                  | SLU <sup>601</sup> O27 - Asp <sup>420</sup> O $\delta$ 1   | 3.22 | SLU <sup>2001</sup> O27 - Asp <sup>424</sup> O $\delta$ 1                            | 3.23           |
|                  | SLU <sup>601</sup> O27 - Asp <sup>420</sup> O $\delta$ 2   | 2.29 | SLU <sup>2001</sup> O27 - Asp <sup>424</sup> O $\delta$ 2                            | 2.56           |
|                  | -                                                          | -    | SLU <sup>2001</sup> O27 - HOH <sup>2385</sup> O                                      | 2.86           |
|                  | SLU <sup>601</sup> O28 - Asp <sup>420</sup> O $\delta$ 1   | 2.59 | SLU <sup>2001</sup> O28 - Asp <sup>424</sup> O $\delta$ 1                            | 2.70           |
|                  | SLU <sup>601</sup> O28 - Asp <sup>420</sup> O $\delta$ 2   | 2.98 | -                                                                                    | -              |
|                  | SLU <sup>601</sup> O28 - HOH <sup>830</sup> O              | 2.75 | SLU <sup>2001</sup> O28 - HOH <sup>2136</sup> O                                      | 2.80           |
|                  | SLU <sup>601</sup> N31 - HOH <sup>830</sup> O              | 3.20 | SLU <sup>2001</sup> N31 - HOH <sup>2136</sup> O                                      | 2.91           |
|                  | SLU <sup>601</sup> N29 - HOH <sup>924</sup> O              | 2.93 | SLU <sup>2001</sup> N29 - HOH <sup>2410</sup> O                                      | 2.99           |
|                  | SLU <sup>601</sup> N37 - Gly <sup>314</sup> N              | 3.28 | SLU <sup>2001</sup> N37 - Gly <sup>318</sup> N                                       | 3.10           |
|                  | SLU <sup>601</sup> N38 - Gly <sup>337</sup> O              | 2.54 | SLU <sup>2001</sup> N38 - Gly <sup>341</sup> O                                       | 2.84           |
|                  | -                                                          | -    | SLU <sup>2001</sup> N38 - HOH <sup>2564</sup> O                                      | 2.71           |

<sup>a</sup>The number shows the distance between donor and acceptor atoms in Å.

**Table S6. Stability of the recombinant proteins.**

| Protein   | RLU/ng protein<br>(0 h on ice) <sup>a</sup> | RLU/ng protein<br>(12 h on ice) <sup>a</sup> | Remaining activity (%) |
|-----------|---------------------------------------------|----------------------------------------------|------------------------|
| AncElat   | 1.77                                        | 1.41                                         | 79.8                   |
| AncCanth  | 6014.62                                     | 5195.45                                      | 86.4                   |
| AncLamp   | 49863.41                                    | 47656.04                                     | 95.6                   |
| AncLuc1   | 40471.84                                    | 37617.22                                     | 92.9                   |
| AncLuc2   | 57978.09                                    | 52424.62                                     | 90.4                   |
| AncLampn1 | 32913.34                                    | 40851.94                                     | 124.1                  |
| AncLucin1 | 13723.18                                    | 16697.27                                     | 121.7                  |

<sup>a</sup>Luminescence reaction was initiated by injecting the 430 ng of purified recombinant luciferase into the mixture of D-luciferin (final conc. 10  $\mu$ M D-luciferin, 5 mM MgCl<sub>2</sub>, 100  $\mu$ M ATP, 50 mM Tris-HCl, pH 7.8). Relative light intensity (RLU) was measured using a luminometer Centro LB960 (Berthold), and integrated from 2 to 32 s after mixing (total 30 s).

## REFERENCES AND NOTES

1. S. Lewis, *Silent Sparks: The Wondrous World of Fireflies* (Princeton Univ. Press, 2016).
2. G. J. Martin, M. A. Branham, M.F. Whiting, S. M. Bybee, Total evidence phylogeny and the evolution of adult bioluminescence in fireflies (Coleoptera: Lampyridae). *Mol. Phylogenet. Evol.* **107**, 564–575 (2017).
3. G. J. Martin, K. F. Stanger-Hall, M. A. Branham, L. F. L. Da Silveira, S. E. Lower, D. W. Hall, X.-Y. Li, A. R. Lemmon, E. M. Lemmon, S. M. Bybee, Higher-level phylogeny and reclassification of Lampyridae (Coleoptera: Elateroidea). *Insect Syst. Diver.* **3**, 11 (2019).
4. T. R. Fallon, S. E. Lower, C.-H. Chang, M. Bessho-Uehara, G. J. Martin, A. J. Bewick, M. Behringer, H. J. Debat, I. Wong, J. C. Day, A. Suvorov, C. J. Silva, K. F. Stanger-Hall, D. W. Hall, R. J. Schmitz, D. R. Nelson, S. M. Lewis, S. Shigenobu, S. M. Bybee, A. M. Larracuenta, Y. Oba, J.-K. Weng, Firefly genomes illuminate parallel origins of bioluminescence in beetles. *eLife* **7**, e36495 (2018).
5. H. H. Seliger, A. B. Lall, J. E. Lloyd, W. H. Biggley, The colors of firefly bioluminescence—I. Optimization model. *Photochem. Photobiol.* **36**, 673–680 (1982).
6. S. V. Kazantsev, *Protoluciola albertalleni* gen.n., sp.n., a new Luciolinae firefly (Insecta: Coleoptera: Lampyridae) from Burmite amber. *Russian Entomol. J.* **24**, 281–283 (2015).
7. T. Nakatsu, S. Ichiyama, J. Hiratake, A. Saldanha, N. Kobashi, K. Sakata, H. Kato, Structural basis for the spectral difference in luciferase bioluminescence. *Nature* **440**, 372–376 (2006).
8. J. B. Buck, The anatomy and physiology of the light organ in fireflies. *Ann. N. Y. Acad. Sci.* **49**, 397–485 (1948).
9. M. Bessho-Uehara, K. Konishi, Y. Oba, Biochemical characteristics and gene expression profiles of two paralogous luciferases from the Japanese firefly *Pyrocoelia atripennis* (Coleoptera, Lampyridae, Lampyrinae): Insight into the evolution of firefly luciferase genes. *Photochem. Photobiol. Sci.* **16**, 1301–1310 (2017).
10. Y. Oba, N. Mori, M. Yoshida, S. Inouye, Identification and characterization of a luciferase isotype in the Japanese firefly, *Luciola cruciata*, involving in the dim glow of firefly eggs. *Biochemistry* **49**, 10788–10795 (2010).
11. M. Bessho-Uehara, Y. Oba, Identification and characterization of the Luc2-type luciferase in the Japanese firefly, *Luciola parvula*, involved in a dim luminescence in immobile stages. *Luminescence* **32**, 924–931 (2017).
12. J. W. Thornton, Resurrecting ancient genes: Experimental analysis of extinct molecules. *Nat. Rev. Genet.* **5**, 366–375 (2004).

13. Y. Oba, M. Ojika, S. Inouye, Firefly luciferase is a bifunctional enzyme: ATP-dependent monooxygenase and a long chain fatty acyl-CoA synthetase. *FEBS Lett.* **540**, 251–254 (2003).
14. Y. Oba, M. Sato, M. Ojika, S. Inouye, Enzymatic and genetic characterization of firefly luciferase and *Drosophila* CG6178 as a fatty acyl-CoA synthetase. *Biosci. Biotechnol. Biochem.* **69**, 819–828 (2005).
15. S. T. Adams Jr., S. C. Miller, Enzymatic promiscuity and the evolution of bioluminescence. *FEBS J.* **287**, 1369–1380 (2020).
16. D. D. McKenna, A. L. Wild, K. Kanda, C. L. Bellamy, R. G. Beutel, M. S. Caterino, C. W. Farnum, D. C. Hawks, M. A. Ivie, M. L. Jameson, R. A. B. Leschen, A. E. Marvaldi, J. V. McHugh, A. F. Newton, J. A. Robertson, M. K. Thayer, M. F. Whiting, J. F. Lawrence, A. Ślipiński, D. R. Maddison, B. D. Farrell, The beetle tree of life reveals that Coleoptera survived end-Permian mass extinction to diversify during the Cretaceous terrestrial revolution. *Syst. Entomol.* **40**, 835–880 (2015).
17. Y. Oba, M. Furuhashi, M. Bessho, S. Sagawa, H. Ikeya, S. Inouye, Bioluminescence of a firefly pupa: Involvement of a luciferase isotype in the dim glow of pupae and eggs in the Japanese firefly, *Luciola lateralis*. *Photochem. Photobiol. Sci.* **12**, 854–863 (2013).
18. D. T. Amaral, J. R. Silva, V. R. Viviani, Transcriptional comparison of the photogenic and non-photogenic tissues of *Phrixothrix hirtus* (Coleoptera: Phengodidae) and non-luminescent *Chauliognathus flavipes* (Coleoptera: Cantharidae) give insights on the origin of lanterns in railroad worms. *Gene Rep.* **7**, 78–86 (2017).
19. Y. Oba, K. Iida, S. Inouye, Functional conversion of fatty acyl-CoA synthetase to firefly luciferase by site-directed mutagenesis: A key substitution responsible for luminescence activity. *FEBS Lett.* **583**, 2004–2008 (2009).
20. Y. Oba, M. Ojika, S. Inouye, Characterization of CG6178 gene product with high sequence similarity to firefly luciferase in *Drosophila melanogaster*. *Gene* **329**, 137–145 (2004).
21. R. A. Prado, J. A. Barbosa, Y. Ohmiya, V. R. Viviani, Structural evolution of luciferase activity in *Zophobas* mealworm AMP/CoA-ligase (protoluciferase) through site-directed mutagenesis of the luciferin binding site. *Photochem. Photobiol. Sci.* **10**, 1226–1232 (2011).
22. I. Ueda, A. Suzuki, Is there a specific receptor for anesthetics? Contrary effects of alcohols and fatty acids on phase transition and bioluminescence of firefly luciferase. *Biophys. J.* **75**, 1052–1057 (1998).
23. O. Khersonsky, C. Roodveldt, D. S. Tawfik, Enzyme promiscuity: Evolutionary and mechanistic aspects. *Curr. Opin. Chem. Biol.* **10**, 498–508 (2006).

24. V. R. Viviani, Y. Ohmiya, Bovine serum albumin displays luciferase-like activity in presence of luciferyl adenylate: Insights on the origin of protoluciferase activity and bioluminescence colours. *Luminescence* **21**, 262–267 (2006).
25. V. R. Viviani, V. Scorsato, R. A. Prado, J. G. C. Pereira, K. Niwa, Y. Ohmiya, J. A. R. G. Barbosa, The origin of luciferase activity in *Zophobas* mealworm AMP/CoA-ligase (protoluciferase): Luciferin stereoselectivity as a switch for the oxygenase activity. *Photochem. Photobiol.* **9**, 1111–1119 (2010).
26. J. E. Lloyd, Firefly mating ecology, selection and evolution, in *The Evolution of Mating Systems in Insects and Arachnids*, J. C. Choe, B. J. Crespi, Eds. (Cambridge Univ. Press, 1997), pp. 184–191.
27. R. De Cock, Larval and adult emission spectra of bioluminescence in three European firefly species. *Photochem. Photobiol.* **79**, 339–342 (2004).
28. D. W. Hall, S. E. Sander, J. C. Pallansch, K. F. Stanger-Hall, The evolution of adult light emission color in North American fireflies. *Evolution* **70**, 2033–2048 (2016).
29. Y. Oba, M. A. Branham, T. Fukatsu, The terrestrial bioluminescent animals of Japan. *Zoolog. Sci.* **28**, 771–789 (2011).
30. J. Sivinski, Arthropods attract to luminous fungi. *Psyche* **88**, 383–390 (1981).
31. P. Marek, D. Papaj, J. Yeager, S. Molina, W. Moore, Bioluminescent aposematism in millipedes. *Curr. Biol.* **21**, R680–R681 (2011).
32. B. C. Leavell, J. J. Rubin, C. J. W. McClure, K. A. Miner, M. A. Branham, J. R. Barber, Fireflies thwart bat attack with multisensory warnings. *Sci. Adv.* **4**, eaat6601 (2018).
33. V. R. Viviani, D. R. Neves, D. T. Amaral, R. A. Prado, T. Matsushashi, T. Hirano, Bioluminescence of beetle luciferases with 6'-amino-D-luciferin analogues reveals excited keto-oxyluciferin as the emitter and phenolate/luciferin binding site interactions modulate bioluminescence colors. *Biochemistry* **53**, 5208–5220 (2014).
34. B. R. Branchini, D. M. Ablamsky, J. M. Rosenman, L. Uzasci, T. L. Southworth, M. Zimmer, Synergistic mutations produce blue-shifted bioluminescence in firefly luciferase. *Biochemistry* **46**, 13847–13855 (2007).
35. N. Kajiyama, E. Nakano, Isolation and characterization of mutants of firefly luciferase which produce different colors of light. *Protein Eng.* **4**, 691–693 (1991).
36. T. W. Cronin, M. Järvillehto, M. Weckström, A. B. Lall, Tuning of photoreceptor spectral sensitivity in fireflies (Coleoptera: Lampyridae). *J. Comp. Physiol. A* **186**, 1–12 (2000).



37. K. Katoh, K. Misawa, K.-i. Kuma, T. Miyata, MAFFT: A novel method for rapid multiple sequence alignment based on fast Fourier transform. *Nucleic Acids Res.* **30**, 3059–3066 (2002).
38. N. Saitou, M. Nei, The neighbor-joining method: A new method for reconstructing phylogenetic trees. *Mol. Biol. Evol.* **4**, 406–425 (1987).
39. D. T. Jones, W. R. Taylor, J. M. Thornton, The rapid generation of mutation data matrices from protein sequences. *Comput. Appl. Biosci.* **8**, 275–282 (1992).
40. Z. Yang, PAML 4: Phylogenetic analysis by maximum likelihood. *Mol. Biol. Evol.* **24**, 1586–1591 (2007).
41. Z. Yang, B. Rannala, Bayesian estimation of species divergence times under a molecular clock using multiple fossil calibrations with soft bounds. *Mol. Biol. Evol.* **23**, 212–226 (2006).
42. S. Inouye, Y. Sahara, Expression and purification of the calcium binding photoprotein mitrocomin using ZZ-domain as a soluble partner in *E. coli* cells. *Protein Express. Purif.* **66**, 52–57 (2009).
43. D.-i. Kato, Y. Hiraishi, M. Maenaka, K. Yokoyama, K. Niwa, Y. Ohmiya, M. Takeo, S. Negoro, Interconversion of ketoprofen recognition in firefly luciferase-catalyzed enantioselective thioesterification reaction using from *Pylocoeria miyako* (PmL) and *Hotaria parvura* (HpL) just by mutating two amino acid residues. *J. Biotechnol.* **168**, 277–283 (2013).
44. T. G. G. Battye, L. Kontogiannis, O. Johnson, H. R. Powell, A. G. W. Leslie, iMOSFLM: A new graphical interface for diffraction-image processing with MOSFLM. *Acta Crystallogr. D Biol. Crystallogr.* **67**, 271–281 (2011).
45. P. D. Adams, P. V. Afonine, G. Bunkóczi, V. B. Chen, I. W. Davis, N. Echols, J. J. Headd, L.-W. Hung, G. J. Kapral, R. W. Grosse-Kunstleve, A. J. McCoy, N. W. Moriarty, R. Oeffner, R. J. Read, D. C. Richardson, J. S. Richardson, T. C. Terwilliger, P. H. Zwart, PHENIX: A comprehensive Python-based system for macromolecular structure solution. *Acta Crystallogr. D Biol. Crystallogr.* **66**, 213–221 (2010).
46. P. Emsley, B. Lohkamp, W. G. Scott, K. Cowtan, Features and development of Coot. *Acta Crystallogr. D Biol. Crystallogr.* **66**, 486–501 (2004).
47. R. A. Laskowski, D. S. Moss, J. M. Thornton, Main-chain bond lengths and bond angles in protein structures. *J. Mol. Biol.* **231**, 1049–1067 (1993).

48. E. F. Pettersen, T. D. Goddard, C. C. Huang, G. S. Couch, D. M. Greenblatt, E. C. Meng, T. E. Ferrin, UCSF Chimera—A visualization system for exploratory research and analysis. *J. Comput. Chem.* **25**, 1605–1612 (2004).
49. W. Tian, C. Chen, X. Lei, J. Zhao, J. Liang, CASTp 3.0: Computed atlas of surface topography of proteins. *Nucleic Acids Res.* **46**, W363–W367 (2018).
50. R. Dawkins, Y. Wong, *The ancestor's tale: a pilgrimage to the dawn of life* (Weidenfeld & Nicolson, London, revised and expanded edition, 2016), pp. 1–11.
51. V. R. Viviani, E. J. H. Bechara, Y. Ohmiya, Cloning, sequence analysis, and expression of active *Phrixothrix* railroad-worms luciferases: Relationship between bioluminescence spectra and primary structures. *Biochemistry* **38**, 8271–8279 (1999).
52. V. R. Viviani, Y. Ohmiya, Bioluminescence color determinants of *Phrixothrix* railroad-worm luciferases: Chimeric luciferases, site-directed mutagenesis of Arg 215 and guanidine effect. *Photochem. Photobiol.* **72**, 267–271 (2000).
53. Y. Ohmiya, M. Sumiya, V. R. Viviani, N. Ohba, Comparative aspects of a luciferase molecule from the Japanese luminous beetle, *Rhagophthalmus ohbai*. *Sci. Rep. Yokosuka City Mus.* **47**, 31–38 (2000).
54. K. V. Wood, Y. A. Lam, H. H. Seliger, W. D. McElroy, Complementary DNA coding click beetle luciferases can elicit bioluminescence of different colors. *Science* **244**, 700–702 (1989).
55. Y. Oba, M. Kumazaki, S. Inouye, Characterization of luciferases and its paralogue in the Panamanian luminous click beetle *Pyrophorus angustus*: A click beetle luciferase lacks the fatty acyl-CoA synthetic activity. *Gene* **452**, 1–6 (2010).
56. V. R. Viviani, A. C. R. Silva, G. L. O. Perez, R. V. Santelli, E. J. H. Bechara, F. C. Reinach, Cloning and molecular characterization of the cDNA for the Brazilian larval click-beetle *Pyrearinus termitilluminans* luciferase. *Photochem. Photobiol.* **70**, 254–260 (1999).
57. A. J. Silva Neto, V. Scorsato, F. G. C. Arnoldi, V. R. Viviani, *Pyrearinus termitilluminans* larval click beetle luciferase: Active site properties, structure and function relationships and comparison with other beetle luciferases. *Photochem. Photobiol. Sci.* **8**, 1748–1754 (2009).
58. Y. Mitani, R. Futahashi, K. Niwa, N. Ohba, Y. Ohmiya, Cloning and characterization of luciferase from a Fijian luminous click beetle. *Photochem. Photobiol.* **89**, 1163–1169 (2013).
59. G. D. Kutuzova, R. R. Hannah, K. V. Wood, Bioluminescence color variation and kinetic behavior relationships among beetle luciferases, in *Bioluminescence and Chemiluminescence: Molecular Reporting with Photons*, J. W. Hastings, L. J. Kricka, P. E. Stanley, Eds. (John Wiley and Sons, 1997), pp. 248–252.

60. H. Tatsumi, T. Masuda, N. Kajiyama, E. Nakano, Luciferase cDNA from Japanese firefly, *Luciola cruciata*: Cloning, structure and expression in *Escherichia coli*. *J. Biolumin. Chemilumin.* **3**, 75–78 (1989).
61. Y. Oba, M. Yoshida, T. Shintani, M. Furuhashi, S. Inouye, Firefly luciferase genes from the subfamilies Psilocladinae and Otoretinae (Lampyridae, Coleoptera). *Comp. Biochem. Physiol. B Biochem. Mol. Biol.* **161**, 110–116 (2012).
62. Y. Ohmiya, N. Ohba, H. Toh, F. I. Tsuji, Cloning, expression and sequence analysis of cDNA for the luciferases from the Japanese fireflies, *Pyrocoelia miyako* and *Hotaria parvula*. *Photochem. Photobiol.* **62**, 309–313 (1995).
63. M. I. Koksharov, N. N. Ugarova, Random mutagenesis of *Luciola mingrelica* firefly luciferase. Mutant enzymes with bioluminescence spectra showing low pH sensitivity. *Biochemistry (Mosc.)* **73**, 862–869 (2008).
64. B. R. Branchini, T. L. Southworth, J. P. DeAngelis, A. Roda, E. Michelini, Luciferase from the Italian firefly *Luciola italica*: Molecular cloning and expression. *Comp. Biochem. Physiol. B Biochem. Mol. Biol.* **145**, 159–167 (2006).
65. B. R. Branchini, T. L. Southworth, L. J. Salituro, D. M. Fontaine, Y. Oba, Cloning of the Blue Ghost (*Phausis reticulata*) luciferase reveals a glowing source of green light. *Photochem. Photobiol.* **93**, 473–478 (2017).
66. M. Mortazavi, S. Hosseinkhani, K. Khajeh, B. Ranjbar, A. R. Emamzadeh, Spectroscopic and functional characterization of *Lampyris turkestanicus* luciferase: A comparative study. *Acta Biochim. Biophys. Sin.* **40**, 365–374 (2008).
67. Y. Oba, M. Furuhashi, S. Inouye, Identification of a functional luciferase gene in the non-luminous diurnal firefly, *Lucidina biplagiata*. *Insect Mol. Biol.* **19**, 737–743 (2010).
68. V. R. Viviani, F. G. C. Arnoldi, M. Brochetto-Braga, Y. Ohmiya, Cloning and characterization of the cDNA for the Brazilian *Cratomorphus distinctus* larval firefly luciferase: Similarities with European *Lampyris noctiluca* and Asiatic *Pyrocoelia* luciferases. *Comp. Biochem. Physiol. B Biochem. Mol. Biol.* **139**, 151–156 (2004).
69. N. Kh. Tafreshi, M. Sadeghizadeh, R. Emamzadeh, B. Ranjbar, H. Naderi-Manesh, S. Hosseinkhani, Site-directed mutagenesis of firefly luciferase: Implication of conserved residue(s) in bioluminescence emission spectra among firefly luciferases. *Biochem. J.* **412**, 27–33 (2008).
70. G. B. Sala-Newby, C. M. Thomson, A. K. Campbell, Sequence and biochemical similarities between the luciferases of the glow-worm *Lampyris noctiluca* and the firefly *Photinus pyralis*. *Biochem. J.* **313**, 761–767 (1996).

71. M. I. Koksharov, N. N. Ugarova, Strategy of mutual compensation of green and red mutants of firefly luciferase identifies a mutation of the highly conservative residue E457 with a strong red shift of bioluminescence. *Photochem. Photobiol. Sci.* **12**, 2016–2027 (2013).
72. B. R. Branchini, R. A. Magyar, M. H. Murtiashaw, N. C. Portier, The role of active site residue arginine 218 in firefly luciferase bioluminescence. *Biochemistry* **40**, 2410–2418 (2001).
73. V. R. Viviani, F. G. C. Arnoldi, A. J. S. Neto, T. L. Oehlmeyer, E. J. H. Bechara, Y. Ohmiya, The structural origin and biological function of pH-sensitivity in firefly luciferases. *Photochem. Photobiol. Sci.* **7**, 159–169 (2008).
74. B. R. Branchini, T. L. Southworth, N. F. Khattak, E. Michelini, A. Roda, Red- and green-emitting firefly luciferase mutants for bioluminescent reporter applications. *Anal. Biochem.* **345**, 140–148 (2005).
75. B. R. Branchini, R. A. Magyar, M. H. Murtiashaw, S. M. Anderson, L. C. Helgerson, M. Zimmer, Site-directed mutagenesis of firefly luciferase active site amino acids: A proposed model for bioluminescence color. *Biochemistry* **38**, 13223–13230 (1999).
76. B. R. Branchini, D. M. Fontaine, T. L. Southworth, B. P. Huta, A. Racela, K. D. Patel, A. M. Gulick, Mutagenesis and structural studies reveal the basis for the activity and stability properties that distinguish the *Photinus* Luciferases *scintillans* and *pyralis*. *Biochemistry* **58**, 4293–4303 (2019).
77. Y. Wang, H. Akiyama, K. Terakado, T. Nakatsu, Impact of site-directed mutant luciferase on quantitative green and orange/red emission intensities in firefly bioluminescence. *Sci. Rep.* **3**, 2490 (2013).
78. D.-i. Kato, T. Kubo, M. Maenaka, K. Niwa, Y. Ohmiya, M. Takeo, S. Negoro, Confirmation of color determination factors for Ser286 derivatives of firefly luciferase from *Luciola cruciata* (LUC-G). *J. Mol. Catal. B: Enzym.* **87**, 18–23 (2013).
79. V. R. Viviani, T. L. Oehlmeyer, F. G. Arnoldi, M. R. Brochetto-Braga, A new firefly luciferase with bimodal spectrum: Identification of structural determinants of spectral pH-sensitivity in firefly luciferases. *Photochem. Photobiol.* **81**, 843–848 (2005).
80. H. Ueda, H. Yamanouchi, A. Kitayama, K. Inoue, T. Hirano, E. Suzuki, T. Nagamune, Y. Ohmiya, in *Bioluminescence and Chemiluminescence: Molecular Reporting with Photons*, J. W. Hastings, L. J. Kricka, P. E. Stanley, Eds. (John Wiley & Sons, 1996), pp. 216–219.
81. Y. Modestova, M. I. Koksharov, N. N. Ugarova, Point mutations in firefly luciferase C-domain demonstrate its significance in green color of bioluminescence. *Biochim. Biophys. Acta* **1844**, 1463–1471 (2014).

82. B. R. Branchini, M. H. Murtiashaw, R. A. Magyar, S. M. Anderson, The role of lysine 529, a conserved residue of the acyl-adenylate-forming enzyme superfamily, in firefly luciferase. *Biochemistry* **39**, 5433–5440 (2000).
